# Supplementary material for: Coordination compounds containing 2-pyridylselenium ligands: synthesis, structural characterization, and antibacterial evaluation
Source: Royal Society of Chemistry journal article supplement (doi:10.1039/d1nj02374h), 2021-01-01
Supplement: d1nj02374h1.pdf [file d1nj02374h1.pdf]

## New Journal of Chemistry

### *Supporting Information*

#### **Coordination compounds containing 2-pyridylselenium ligands: synthesis, structural characterization, and antibacterial evaluation**

Rodrigo Cervo,<sup>a</sup> Thaísa R. R. Lopes,<sup>b</sup> Adriana R. de Vasconcelos,<sup>b</sup> Juliana F. Cargnelutti,<sup>b</sup> Ricardo F. Schumacher,<sup>b</sup> Bárbara Tirloni,<sup>a</sup> Sailer S. dos Santos,<sup>a</sup> Ulrich Abram,<sup>c</sup> Ernesto S. Lang<sup>a</sup> and Roberta Cargnelutti<sup>a\*</sup>

<sup>a</sup> Departamento de Química, CCNE, Universidade Federal de Santa Maria – UFSM, Santa Maria, 97105-900, RS, Brazil.

<sup>b</sup> Laboratório de Bacteriologia (LABAC), Departamento de Medicina Veterinária Preventiva – CCR/UFSM, Santa Maria, 97105-900, RS, Brazil.

<sup>c</sup> Institute of Chemistry and Biochemistry, Freie Universität Berlin, Fabeckstr. 34-36, D-14195, Berlin, Germany.

\* Corresponding author: [roberta.cargnelutti@ufsm.br](mailto:roberta.cargnelutti@ufsm.br)

## Table of Contents

|                                                                                                                                                                                 |    |
|---------------------------------------------------------------------------------------------------------------------------------------------------------------------------------|----|
| <b>Table S1.</b> Crystallographic and structure refinement data for complexes <b>1</b> , <b>2</b> , <b>3</b> , <b>5</b> and <b>6</b> .....                                      | 03 |
| <b>Figure S1.</b> Ellipsoid representations (50% probability) of [CoCl <sub>2</sub> (L)] ( <b>1</b> ) (a) and [CoBr <sub>2</sub> (L)] ( <b>2</b> ) (b).....                     | 04 |
| <b>Figure S2.</b> Ellipsoid representations (50% probability) of [CuCl <sub>2</sub> (L)] ( <b>3</b> ) and ZnCl <sub>2</sub> (L)] ( <b>5</b> ).....                              | 04 |
| <b>Figure S3.</b> Ellipsoid representations (50% probability) of [ReO(apySe) <sub>2</sub> ]Cl·DMF ( <b>6</b> ).....                                                             | 04 |
| <b>Figure S4.</b> <sup>77</sup> Se NMR (76 MHz, CDCl <sub>3</sub> ) spectrum of Ligand L.....                                                                                   | 05 |
| <b>Figure S5.</b> <sup>1</sup> H NMR (400 MHz, DMSO- <i>d</i> <sub>6</sub> ) spectrum of complex <b>5</b> .....                                                                 | 05 |
| <b>Figure S6.</b> <sup>13</sup> C NMR (100 MHz, DMSO- <i>d</i> <sub>6</sub> ) spectrum of complex <b>5</b> .....                                                                | 06 |
| <b>Figure S7.</b> <sup>77</sup> Se NMR (76 MHz, DMSO- <i>d</i> <sub>6</sub> ) spectrum of complex <b>5</b> .....                                                                | 06 |
| <b>Figure S8.</b> 2D COSY NMR spectrum of complex <b>5</b> (DMSO- <i>d</i> <sub>6</sub> ).....                                                                                  | 07 |
| <b>Figure S9.</b> 2D COSY expansion spectrum of complex <b>5</b> (DMSO- <i>d</i> <sub>6</sub> ).....                                                                            | 07 |
| <b>Figure S10.</b> 2D HMQC NMR spectrum of complex <b>5</b> (DMSO- <i>d</i> <sub>6</sub> ).....                                                                                 | 08 |
| <b>Figure S11.</b> 2D HSQC expansion spectrum of complex <b>5</b> (DMSO- <i>d</i> <sub>6</sub> ).....                                                                           | 08 |
| <b>Figure S12.</b> <sup>1</sup> H NMR (400 MHz, DMSO- <i>d</i> <sub>6</sub> ) spectrum of (apySe) <sub>2</sub> .....                                                            | 09 |
| <b>Figure S13.</b> <sup>77</sup> Se NMR (76 MHz, DMSO- <i>d</i> <sub>6</sub> ) spectrum of (apySe) <sub>2</sub> .....                                                           | 09 |
| <b>Figure S14.</b> <sup>1</sup> H NMR (400 MHz, DMSO- <i>d</i> <sub>6</sub> ) spectrum of complex <b>6</b> .....                                                                | 10 |
| <b>Figure S15.</b> <sup>13</sup> C NMR (100 MHz, DMSO- <i>d</i> <sub>6</sub> ) spectrum of complex <b>6</b> .....                                                               | 10 |
| <b>Figure S16.</b> <sup>77</sup> Se NMR (76 MHz, DMSO- <i>d</i> <sub>6</sub> ) spectrum of complex <b>6</b> .....                                                               | 11 |
| <b>Figure S17.</b> 2D COSY NMR spectrum of complex <b>6</b> (DMSO- <i>d</i> <sub>6</sub> ).....                                                                                 | 11 |
| <b>Figure S18.</b> 2D COSY expansion spectrum of complex <b>6</b> (DMSO- <i>d</i> <sub>6</sub> ).....                                                                           | 12 |
| <b>Figure S19.</b> 2D HSQC NMR spectrum of complex <b>6</b> (DMSO- <i>d</i> <sub>6</sub> ).....                                                                                 | 12 |
| <b>Figure S20.</b> 2D HSQC expansion spectrum of complex <b>6</b> (DMSO- <i>d</i> <sub>6</sub> ).....                                                                           | 13 |
| <b>Figure S21.</b> Electronic UV–Vis spectra for L in H <sub>2</sub> O/DMSO (4:1, v/v) solution, measured every 1 hour (total 5 hours); [ ] = 1x10 <sup>-4</sup> M.....         | 13 |
| <b>Figure S22.</b> Electronic UV–Vis spectra for <b>1</b> in H <sub>2</sub> O/DMSO (4:1, v/v) solution, measured every 1 hour (total 5 hours); [ ] = 1x10 <sup>-4</sup> M. .... | 14 |
| <b>Figure S23.</b> Electronic UV–Vis spectra for <b>2</b> in H <sub>2</sub> O/DMSO (4:1, v/v) solution, measured every 1 hour (total 5 hours); [ ] = 1x10 <sup>-4</sup> M.....  | 14 |
| <b>Figure S24.</b> Electronic UV–Vis spectra for <b>3</b> in H <sub>2</sub> O/DMSO (4:1, v/v) solution, measured every 1 hour (total 5 hours); [ ] = 1x10 <sup>-4</sup> M.....  | 15 |
| <b>Figure S25.</b> Electronic UV–Vis spectra for <b>4</b> in H <sub>2</sub> O/DMSO (4:1, v/v) solution, measured every 1 hour (total 5 hours); [ ] = 1x10 <sup>-4</sup> M.....  | 15 |
| <b>Figure S26.</b> Electronic UV–Vis spectra for <b>5</b> in H <sub>2</sub> O/DMSO (4:1, v/v) solution, measured every 1 hour (total 5 hours); [ ] = 1x10 <sup>-4</sup> M.....  | 16 |
| <b>Figure S27.</b> Electronic UV–Vis spectra for <b>6</b> in H <sub>2</sub> O/DMSO (4:1, v/v) solution, measured every 1 hour (total 5 hours); [ ] = 1x10 <sup>-4</sup> M.....  | 16 |

**Table S1.** Crystallographic and structure refinement data for complexes **1**, **2**, **3**, **5** and **6**.

| Complex                                             | <b>1</b>                                                            | <b>2</b>                                                            | <b>3</b>                                                            | <b>5</b>                                                            | <b>6</b>                                                                                                           |
|-----------------------------------------------------|---------------------------------------------------------------------|---------------------------------------------------------------------|---------------------------------------------------------------------|---------------------------------------------------------------------|--------------------------------------------------------------------------------------------------------------------|
| Formula                                             | C <sub>11</sub> H <sub>11</sub> Cl <sub>2</sub> CoN <sub>3</sub> Se | C <sub>11</sub> H <sub>11</sub> Br <sub>2</sub> CoN <sub>3</sub> Se | C <sub>11</sub> H <sub>11</sub> Cl <sub>2</sub> CuN <sub>3</sub> Se | C <sub>11</sub> H <sub>11</sub> Cl <sub>2</sub> N <sub>3</sub> SeZn | C <sub>10</sub> H <sub>10</sub> N <sub>4</sub> OReSe <sub>2</sub> Cl <sub>2</sub> C <sub>3</sub> H <sub>7</sub> NO |
| CCDC n°                                             | 2075668                                                             | 2075669                                                             | 2075670                                                             | 2075671                                                             | 2075672                                                                                                            |
| F.W. (g·mol <sup>-1</sup> )                         | 394.02                                                              | 482.94                                                              | 398.63                                                              | 400.46                                                              | 654.89                                                                                                             |
| Crystal system                                      | Triclinic                                                           | Monoclinic                                                          | Orthorhombic                                                        | Triclinic                                                           | Orthorhombic                                                                                                       |
| Space group                                         | <i>P</i> -1                                                         | <i>P</i> 2 <sub>1</sub> / <i>n</i>                                  | <i>Pna</i> 2 <sub>1</sub>                                           | <i>P</i> -1                                                         | <i>Pbca</i>                                                                                                        |
| <i>a</i> (Å)                                        | 7.6910(4)                                                           | 8.3309(6)                                                           | 13.8873(8)                                                          | 7.6948(8)                                                           | 7.0855(16)                                                                                                         |
| <i>b</i> (Å)                                        | 7.7691(4)                                                           | 12.1666(9)                                                          | 12.4918(7)                                                          | 7.7787(8)                                                           | 16.597(5)                                                                                                          |
| <i>c</i> (Å)                                        | 12.7167(6)                                                          | 14.2649(12)                                                         | 7.9670(4)                                                           | 12.7007(14)                                                         | 31.064(9)                                                                                                          |
| <i>α</i> (°)                                        | 97.9940(10)                                                         | 90                                                                  | 90                                                                  | 98.027(3)                                                           | 90                                                                                                                 |
| <i>β</i> (°)                                        | 91.522(2)                                                           | 93.019(3)                                                           | 90                                                                  | 91.224(3)                                                           | 90                                                                                                                 |
| <i>γ</i> (°)                                        | 112.2890(10)                                                        | 90                                                                  | 90                                                                  | 112.402(3)                                                          | 90                                                                                                                 |
| T (K)                                               | 296(2)                                                              | 296(2)                                                              | 295(2)                                                              | 296(2)                                                              | 100(2)                                                                                                             |
| V (Å <sup>3</sup> )                                 | 693.63(6)                                                           | 1443.87(19)                                                         | 1382.09(13)                                                         | 693.64(13)                                                          | 3653.2(17)                                                                                                         |
| Z                                                   | 2                                                                   | 4                                                                   | 4                                                                   | 2                                                                   | 8                                                                                                                  |
| <i>r</i> <sub>calc.</sub> (g·cm <sup>-3</sup> )     | 1.887                                                               | 2.222                                                               | 1.916                                                               | 1.920                                                               | 2.381                                                                                                              |
| <i>μ</i> (mm <sup>-1</sup> )                        | 2.219                                                               | 4.907                                                               | 2.413                                                               | 2.507                                                               | 10.801                                                                                                             |
| <i>F</i> (000)                                      | 386                                                                 | 916                                                                 | 780                                                                 | 392                                                                 | 2448                                                                                                               |
| Collected reflections                               | 55879                                                               | 19972                                                               | 41077                                                               | 10908                                                               | 44575                                                                                                              |
| Independent reflections [ <i>R</i> <sub>int</sub> ] | 4225 [0.0427]                                                       | 4433 [0.1132]                                                       | 4120 [0.0578]                                                       | 2690 [0.0475]                                                       | 9869 [0.0361]                                                                                                      |
| <i>R</i> <sub>1</sub> [ <i>I</i> > 2σ( <i>I</i> )]  | 0.0394                                                              | 0.0491                                                              | 0.0361                                                              | 0.0493                                                              | 0.0189                                                                                                             |
| <i>wR</i> <sub>2</sub> [ <i>I</i> > 2σ( <i>I</i> )] | 0.0937                                                              | 0.0746                                                              | 0.0815                                                              | 0.1082                                                              | 0.0374                                                                                                             |
| <i>R</i> <sub>1</sub> (all data) <sup>[a]</sup>     | 0.0499                                                              | 0.1199                                                              | 0.0505                                                              | 0.0588                                                              | 0.0241                                                                                                             |
| <i>wR</i> <sub>2</sub> (all data) <sup>[b]</sup>    | 0.0980                                                              | 0.0898                                                              | 0.0872                                                              | 0.1146                                                              | 0.0400                                                                                                             |
| GOOF on <i>F</i> <sup>2</sup>                       | 1.174                                                               | 0.998                                                               | 1.045                                                               | 1.086                                                               | 1.166                                                                                                              |
| Largest diff. peak and hole (e·Å <sup>-3</sup> )    | 0.703 and -0.565                                                    | 0.535 and -0.579                                                    | 0.403 and -0.451                                                    | 0.590 and -0.382                                                    | 0.538 and -0.917                                                                                                   |

$$^{[a]}R_1 = \sum ||F_o| - |F_c|| / \sum |F_o|; \quad ^{[b]}wR_2 = \{\sum w(F_o^2 - F_c^2)^2 / \sum w(F_o^2)^2\}^{1/2}$$

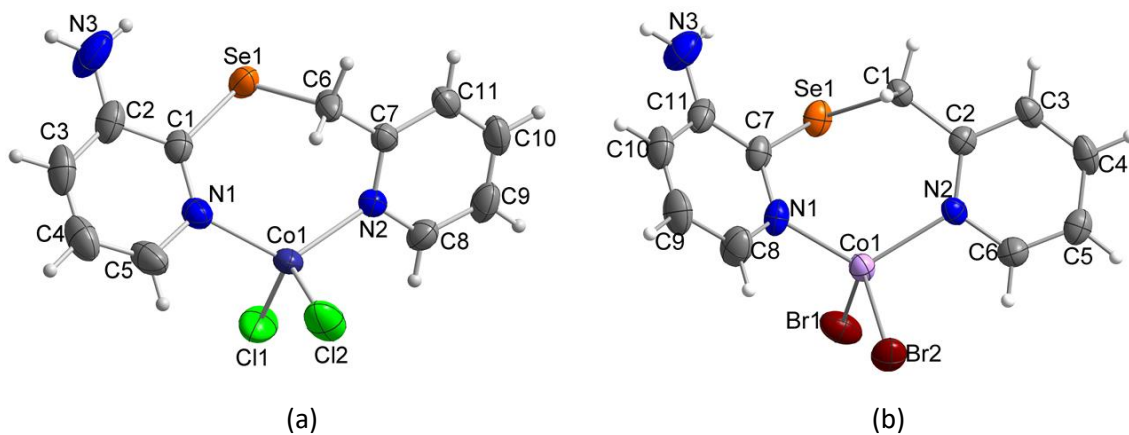

**Figure S1.** Ellipsoid representations (50% probability) of [CoCl<sub>2</sub>(L)] (**1**) (a) and [CoBr<sub>2</sub>(L)] (**2**) (b).

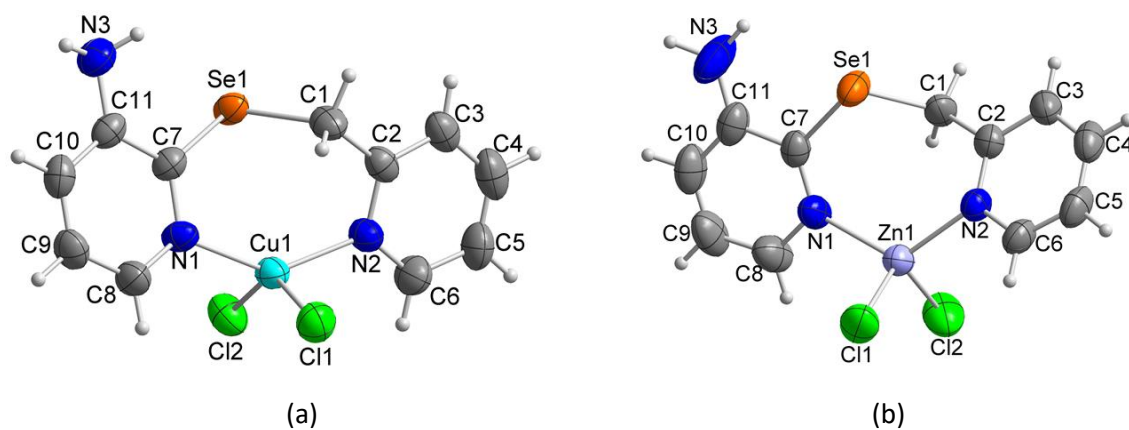

**Figure S2.** Ellipsoid representations (50% probability) of [CuCl<sub>2</sub>(L)] (**3**) (a) and [ZnCl<sub>2</sub>(L)] (**5**) (b).

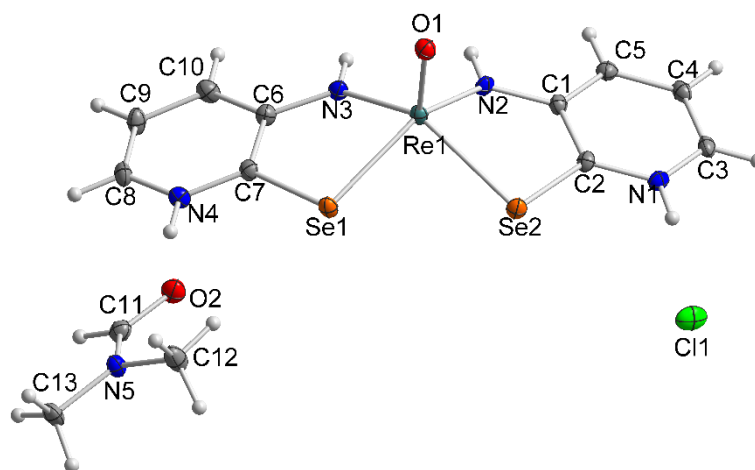

**Figure S3.** Ellipsoid representations (50% probability) of [ReO(apySe)<sub>2</sub>]Cl·DMF (**6**).

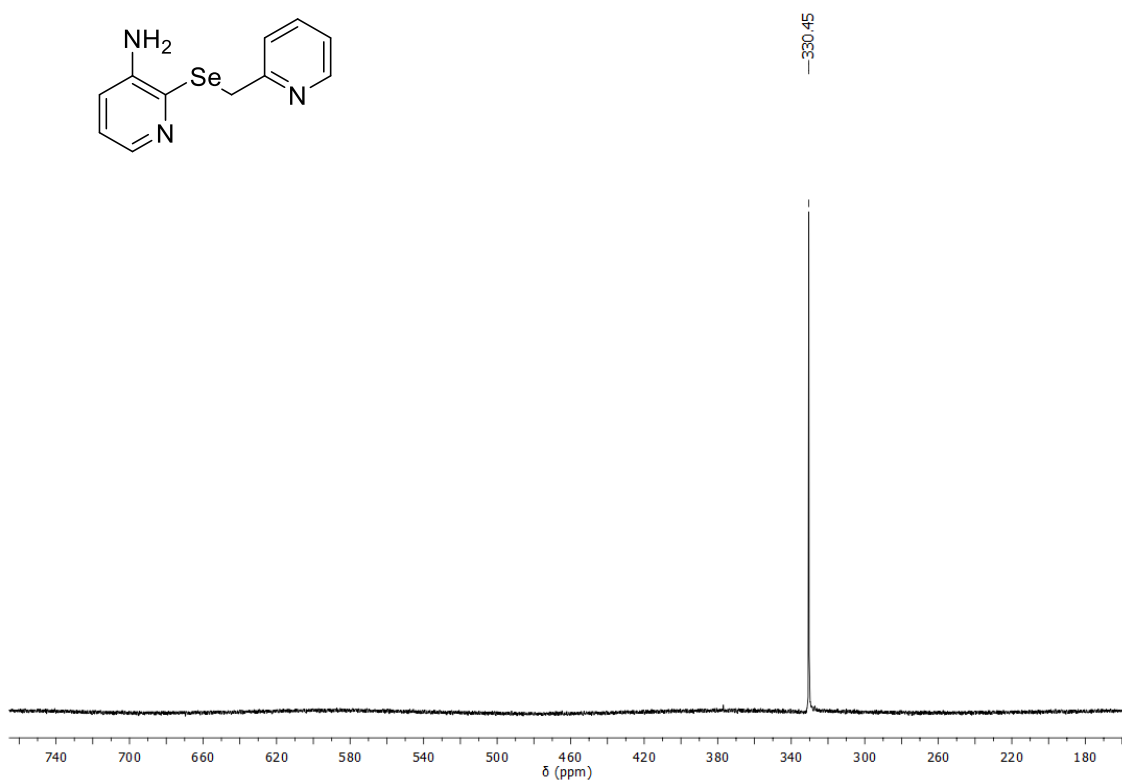

Figure S4.  $^{77}\text{Se}$  NMR (76 MHz,  $\text{CDCl}_3$ ) spectrum of Ligand L.

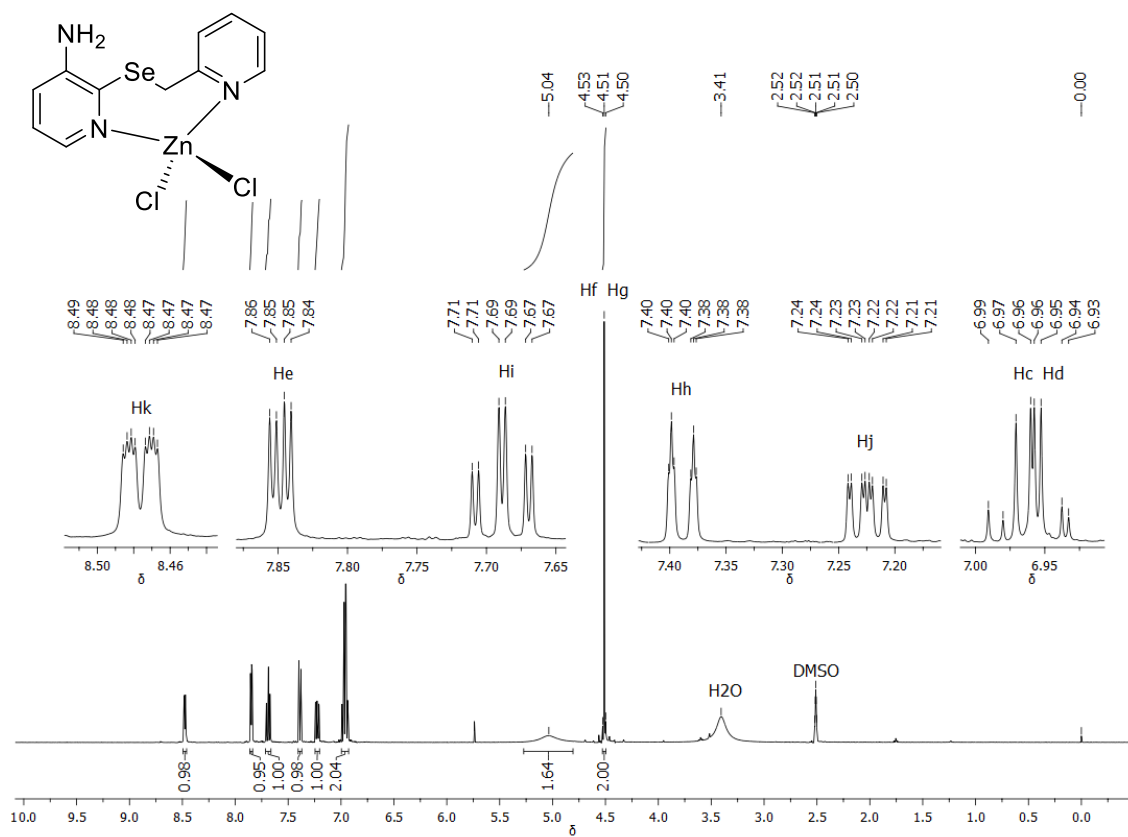

Figure S5.  $^1\text{H}$  NMR (400 MHz,  $\text{DMSO-}d_6$ ) spectrum of complex 5.

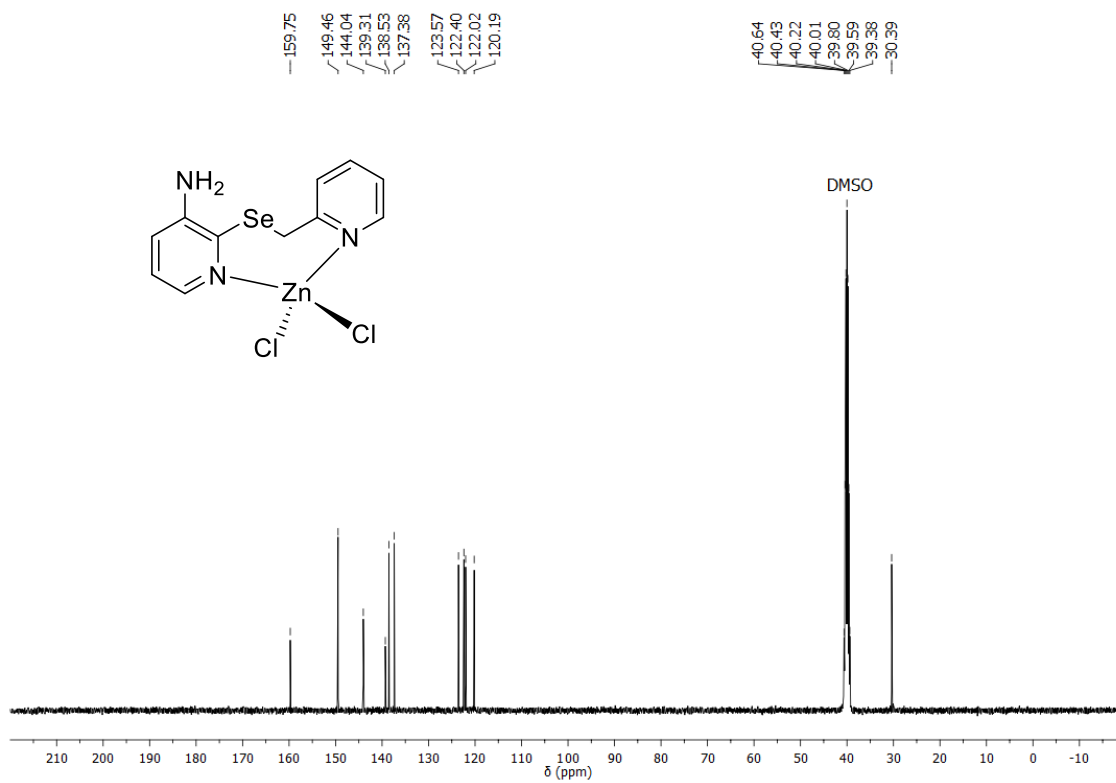

Figure S6.  $^{13}\text{C}$  NMR (100 MHz,  $\text{DMSO-}d_6$ ) spectrum of complex 5.

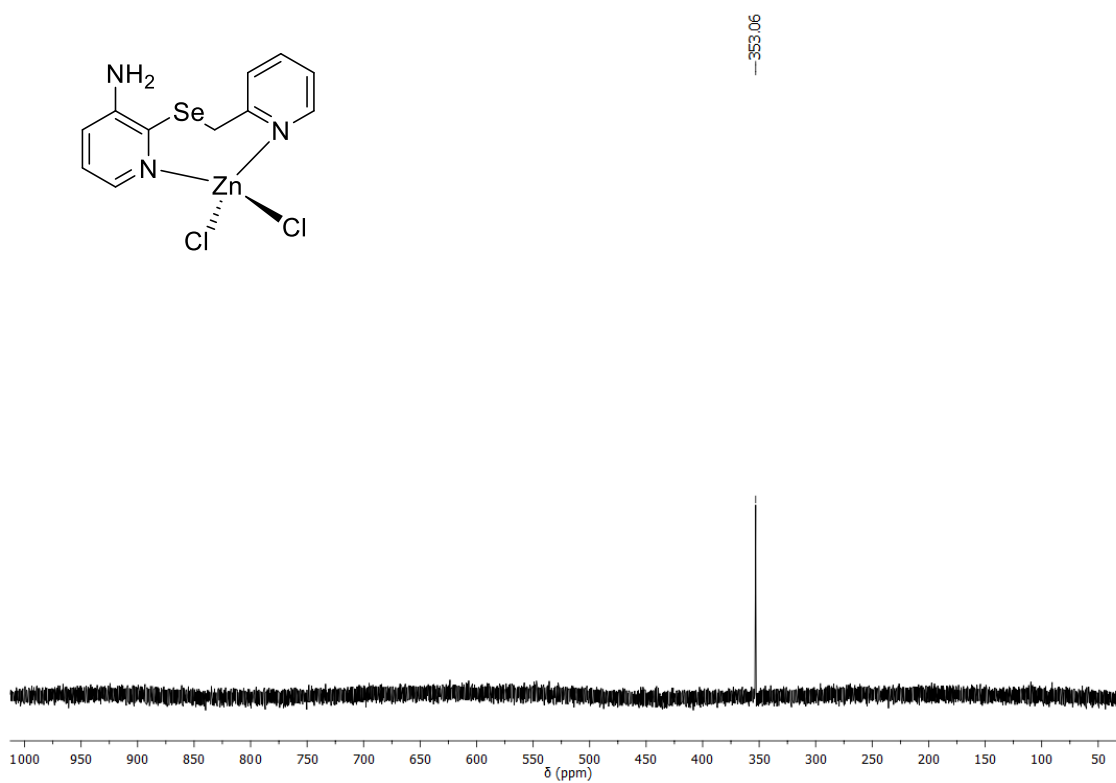

Figure S7.  $^{77}\text{Se}$  NMR (76 MHz,  $\text{DMSO-}d_6$ ) spectrum of complex 5.

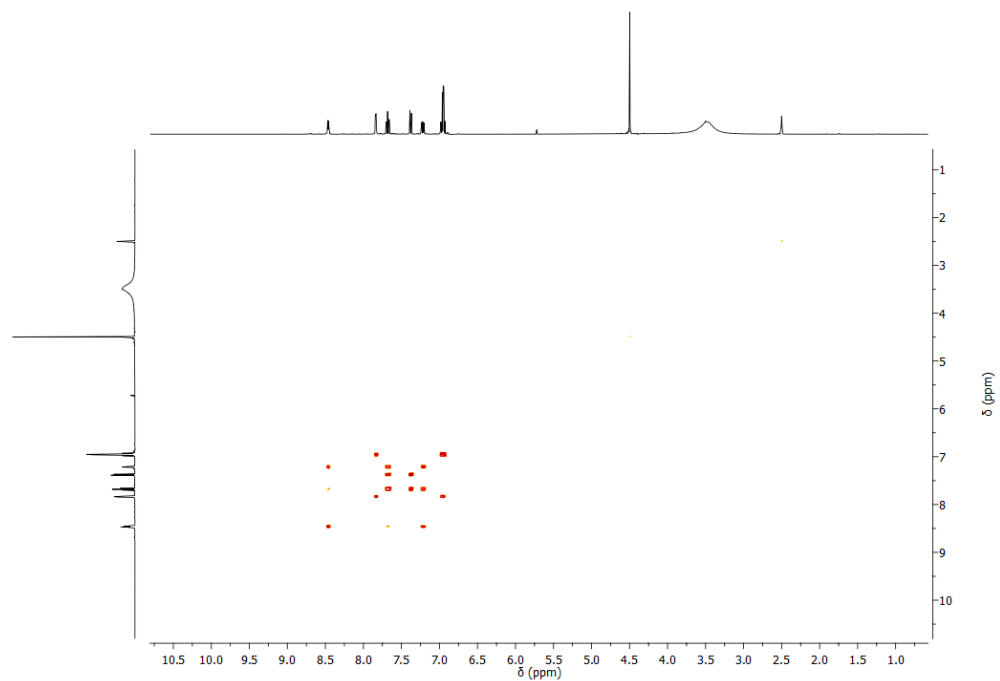

**Figure S8.** 2D COSY NMR spectrum of complex **5** (DMSO- $d_6$ ).

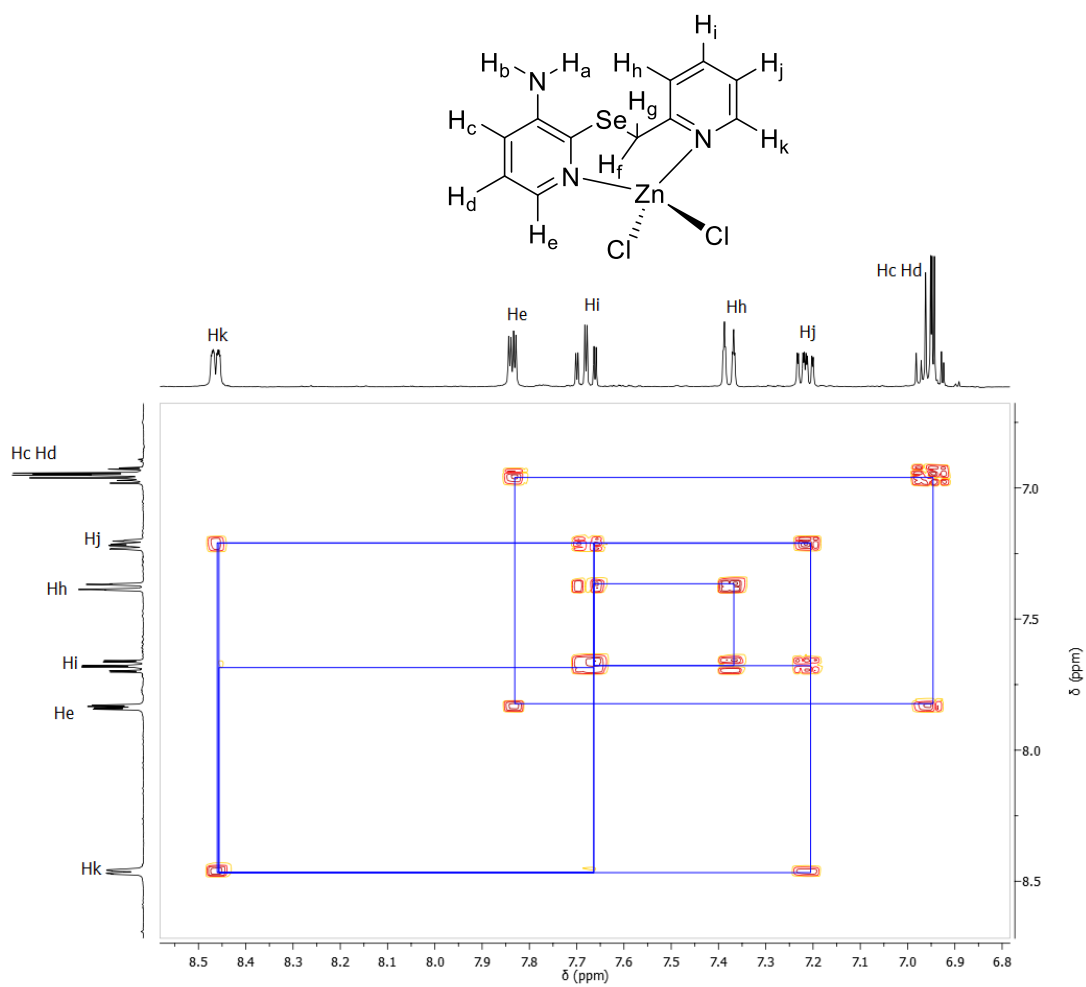

**Figure S9.** 2D COSY expansion spectrum of complex **5** (DMSO- $d_6$ ).

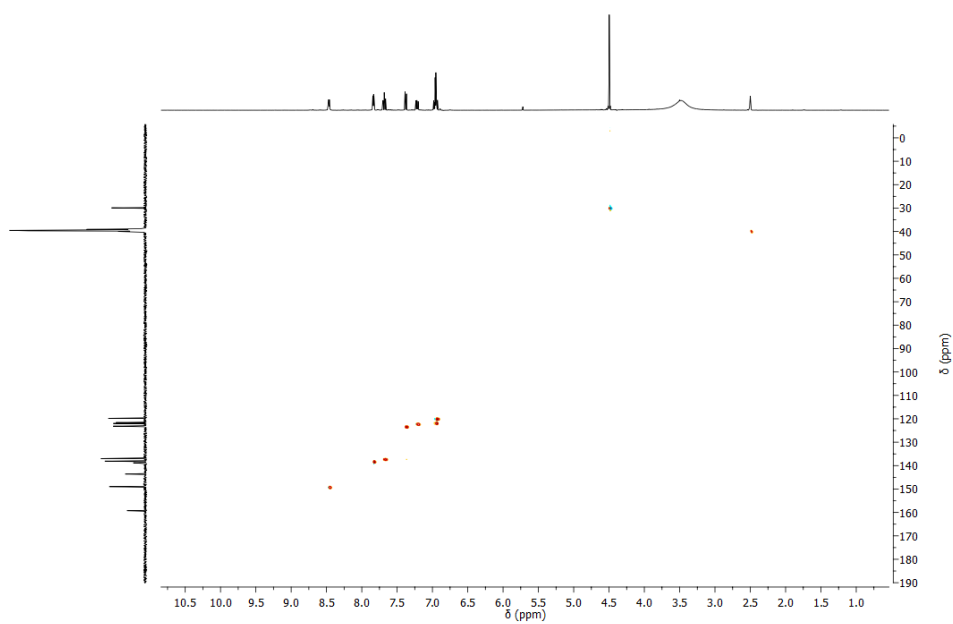

**Figure S10.** 2D HMQC NMR spectrum of complex **5** (DMSO- $d_6$ ).

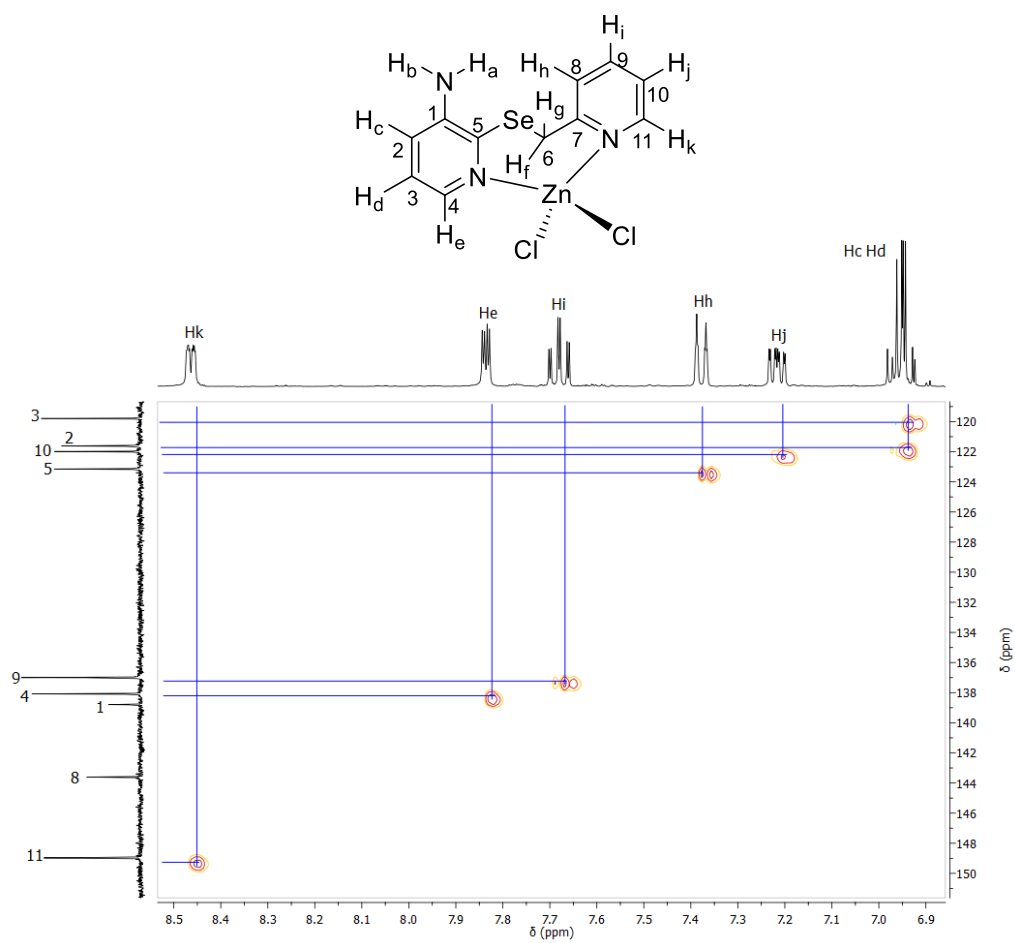

**Figure S11.** 2D HMQC expansion spectrum of complex **5** (DMSO- $d_6$ ).



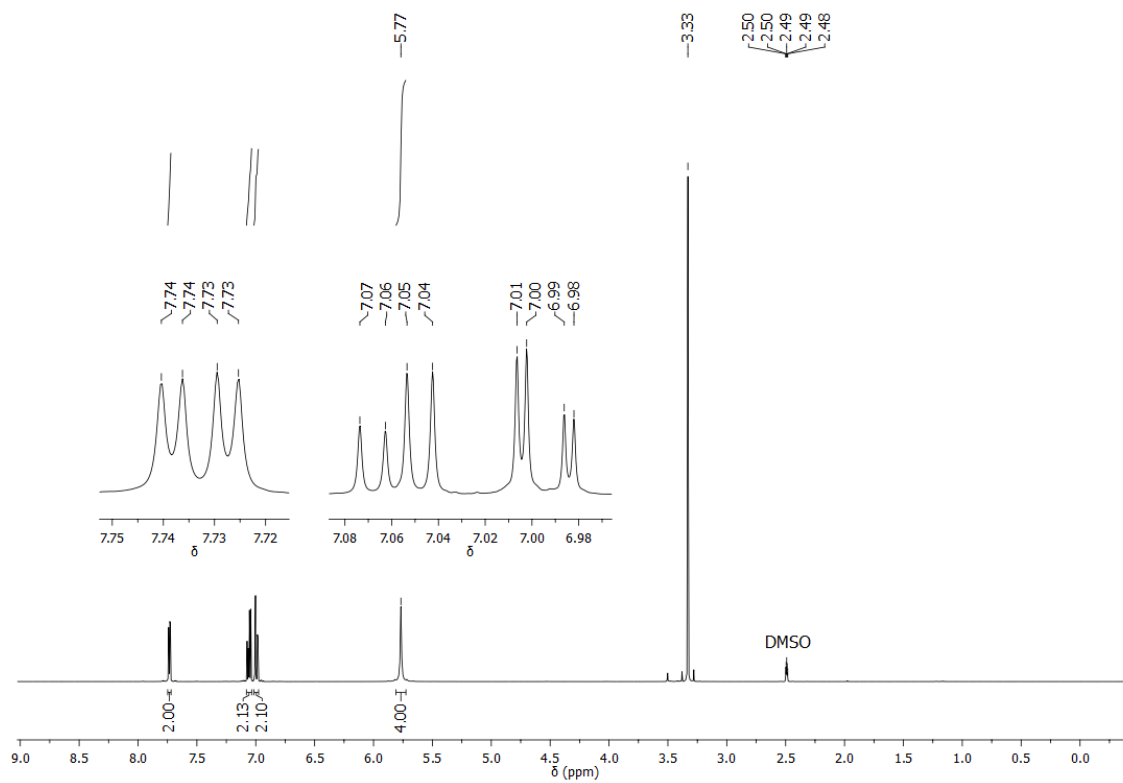

Figure S12. <sup>1</sup>H NMR (400 MHz, DMSO-*d*<sub>6</sub>) spectrum of (apySe)<sub>2</sub>.

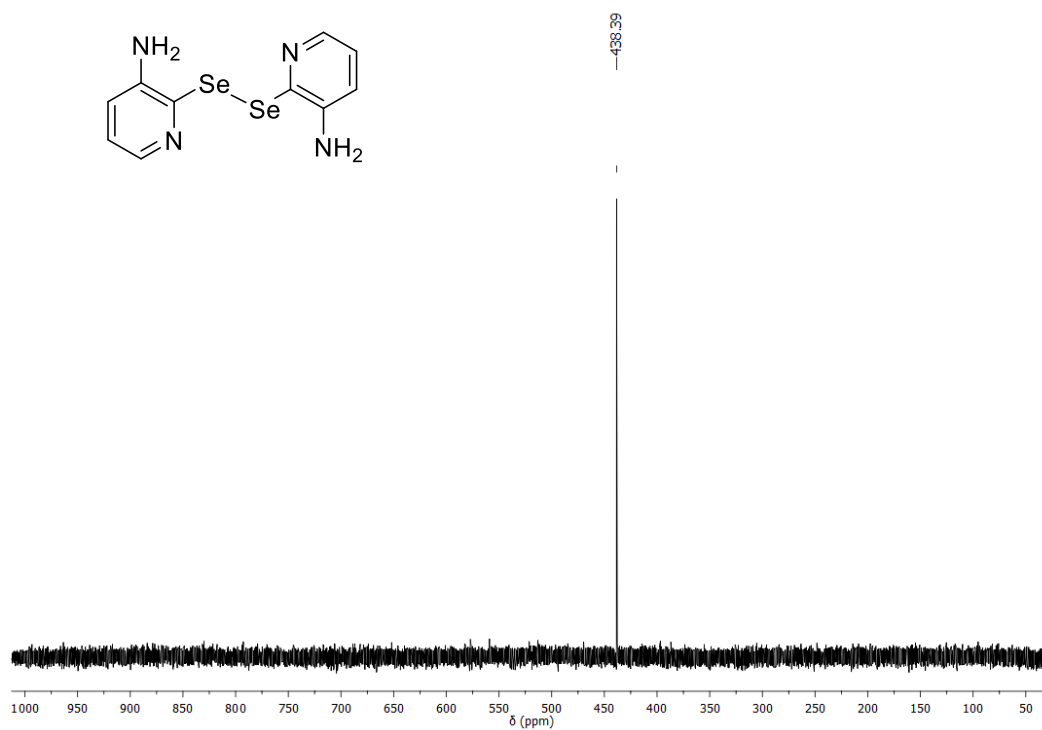

Figure S13. <sup>77</sup>Se NMR (76 MHz, DMSO-*d*<sub>6</sub>) spectrum of (apySe)<sub>2</sub>.

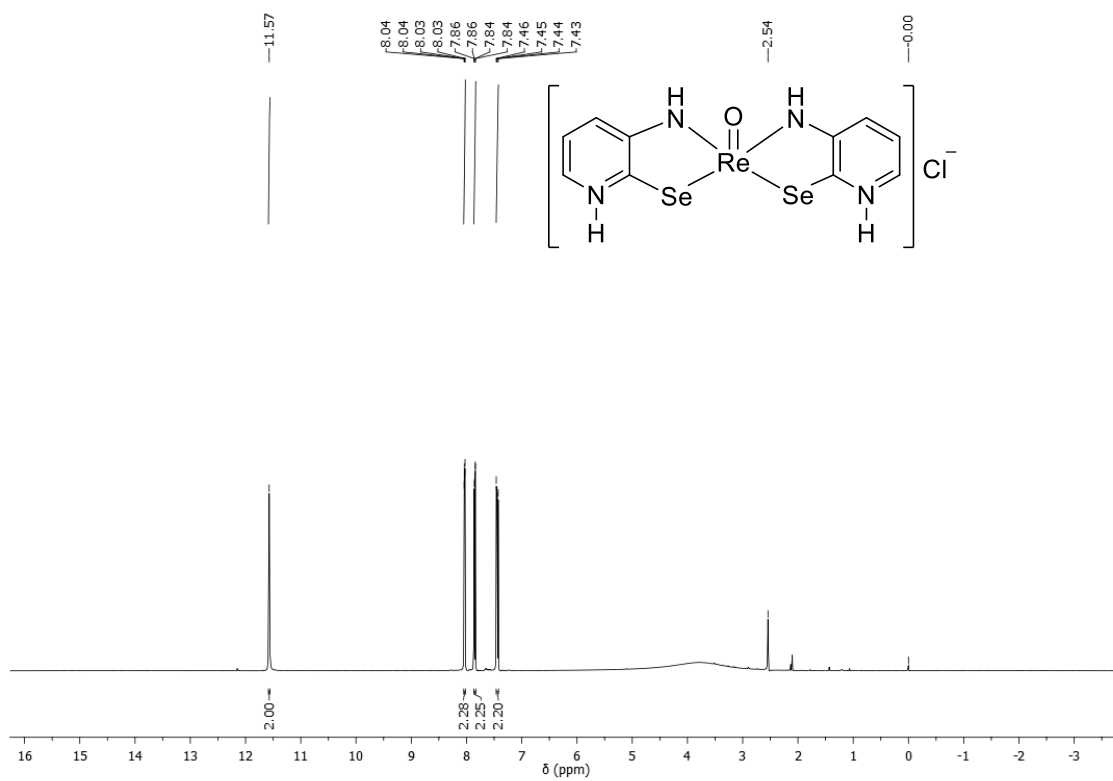

Figure S14.  $^1\text{H NMR}$  (400 MHz,  $\text{DMSO-}d_6$ ) spectrum of complex 6.

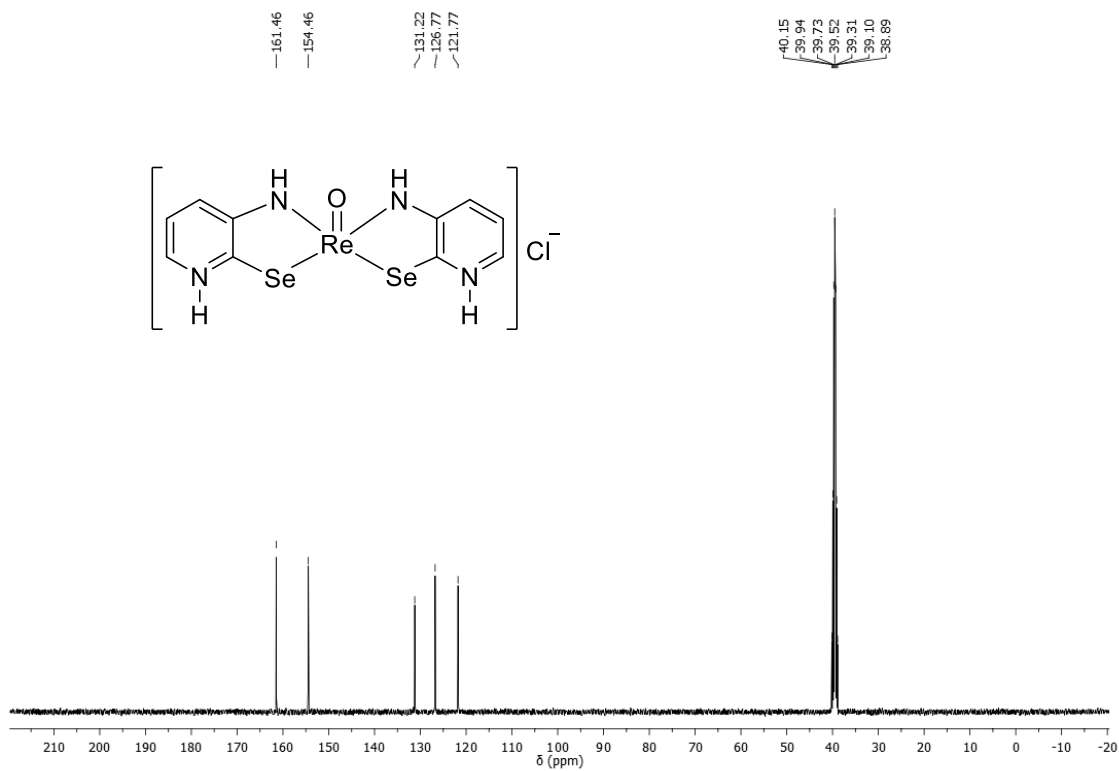

Figure S15.  $^{13}\text{C NMR}$  (100 MHz,  $\text{DMSO-}d_6$ ) spectrum of complex 6.

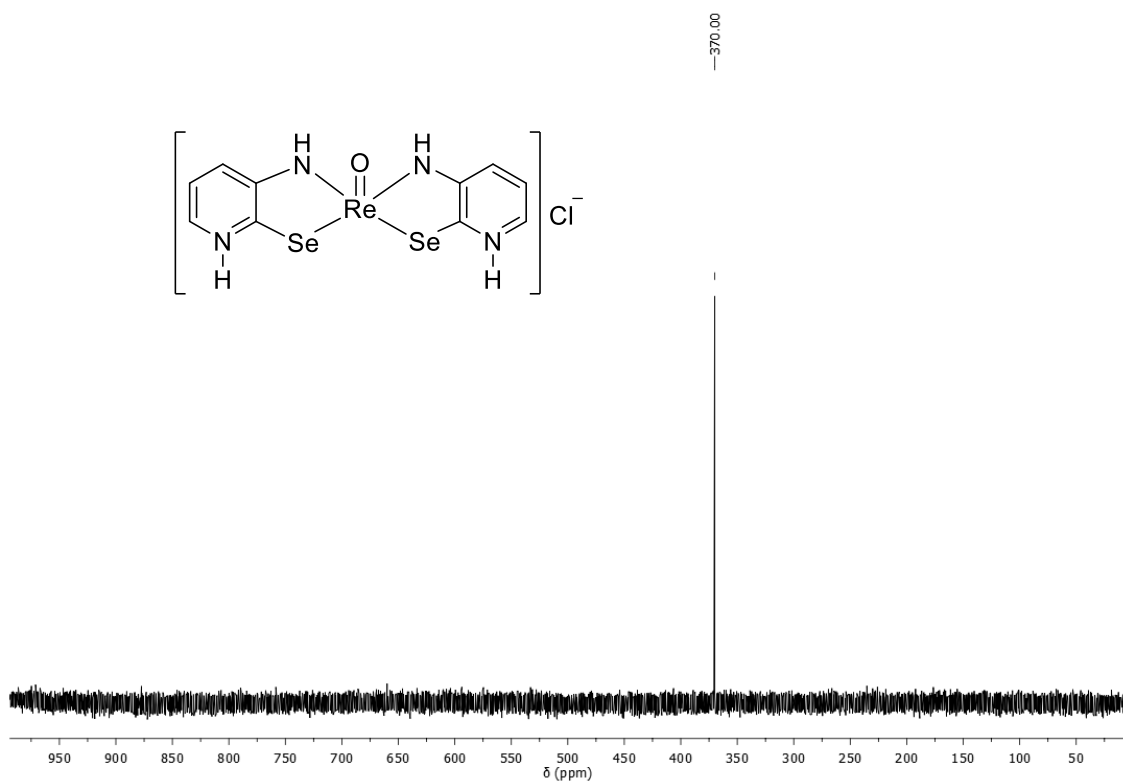

Figure S16.  $^{77}\text{Se}$  NMR (76 MHz,  $\text{DMSO-}d_6$ ) spectrum of complex 6.

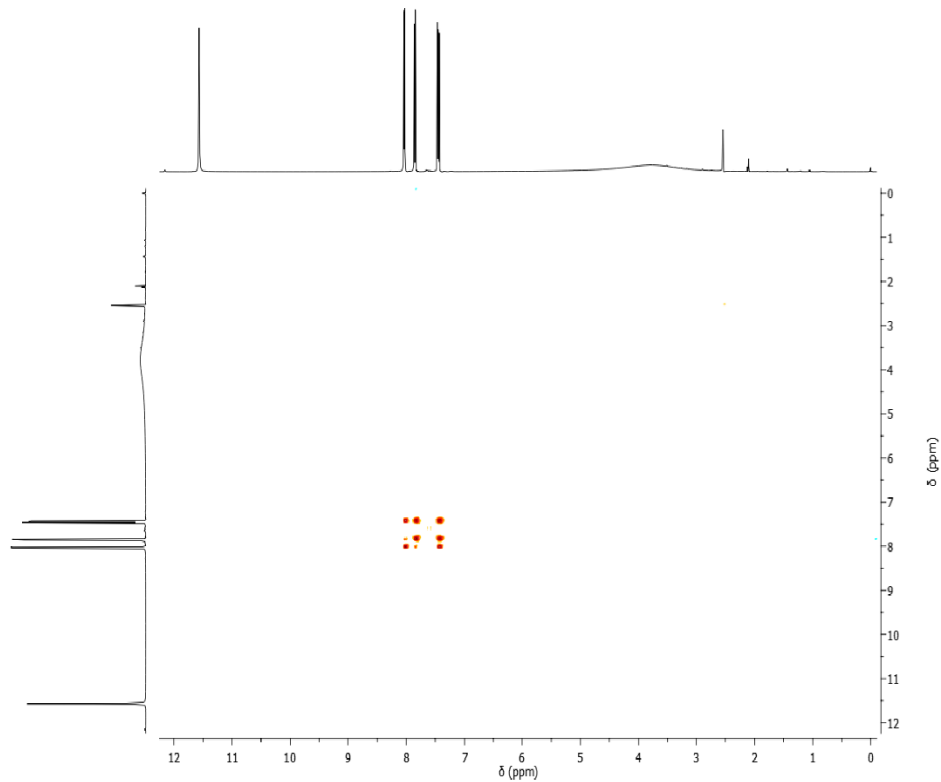

Figure S17. 2D COSY NMR spectrum of complex 6 ( $\text{DMSO-}d_6$ ).

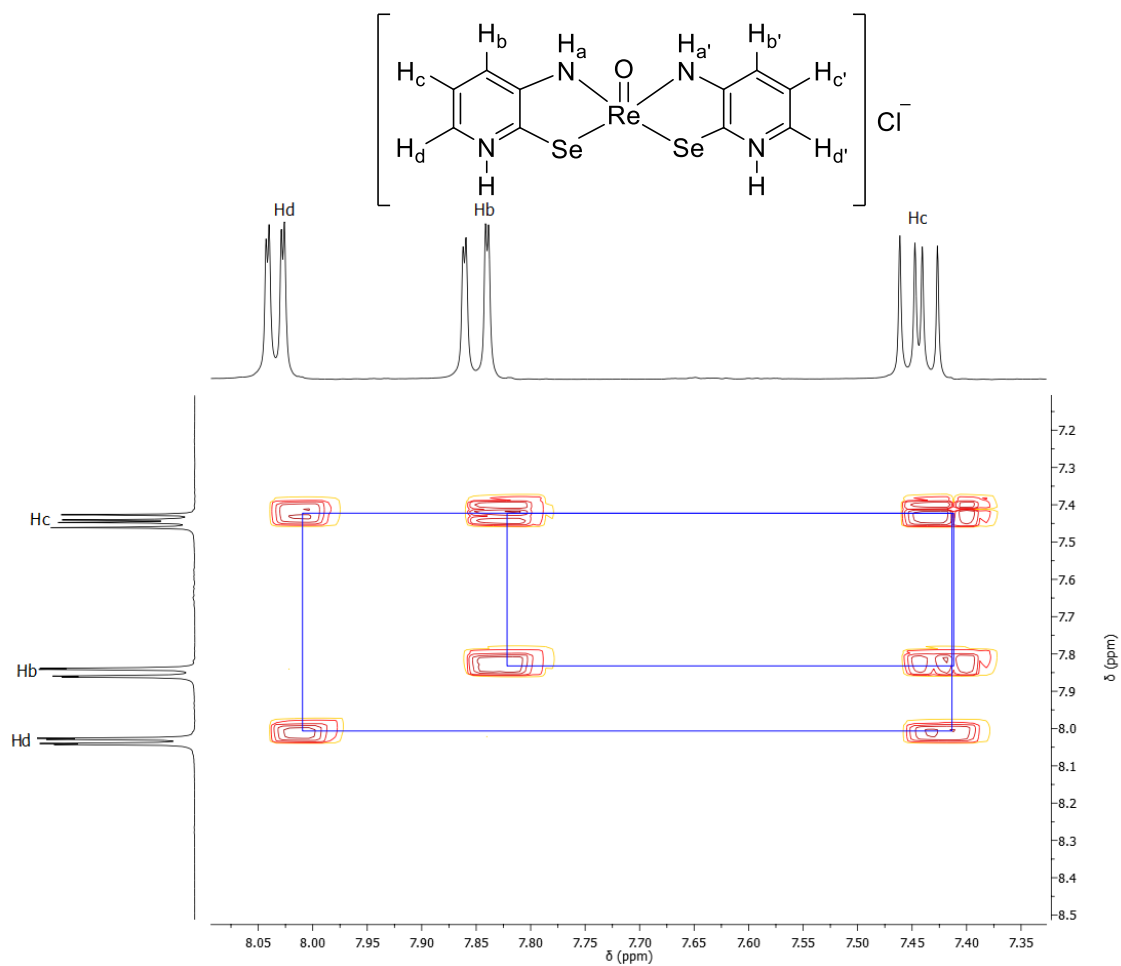

**Figure S18.** 2D COSY expansion spectrum of complex 6 (DMSO- $d_6$ ).

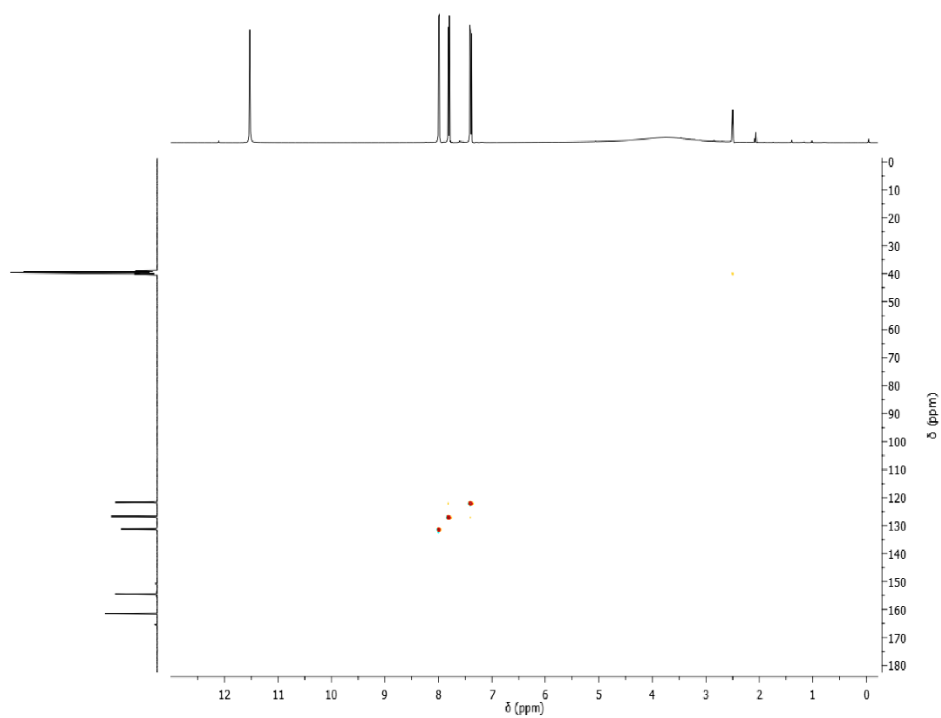

**Figure S19.** 2D HSQC NMR spectrum of complex 6 (DMSO- $d_6$ ).

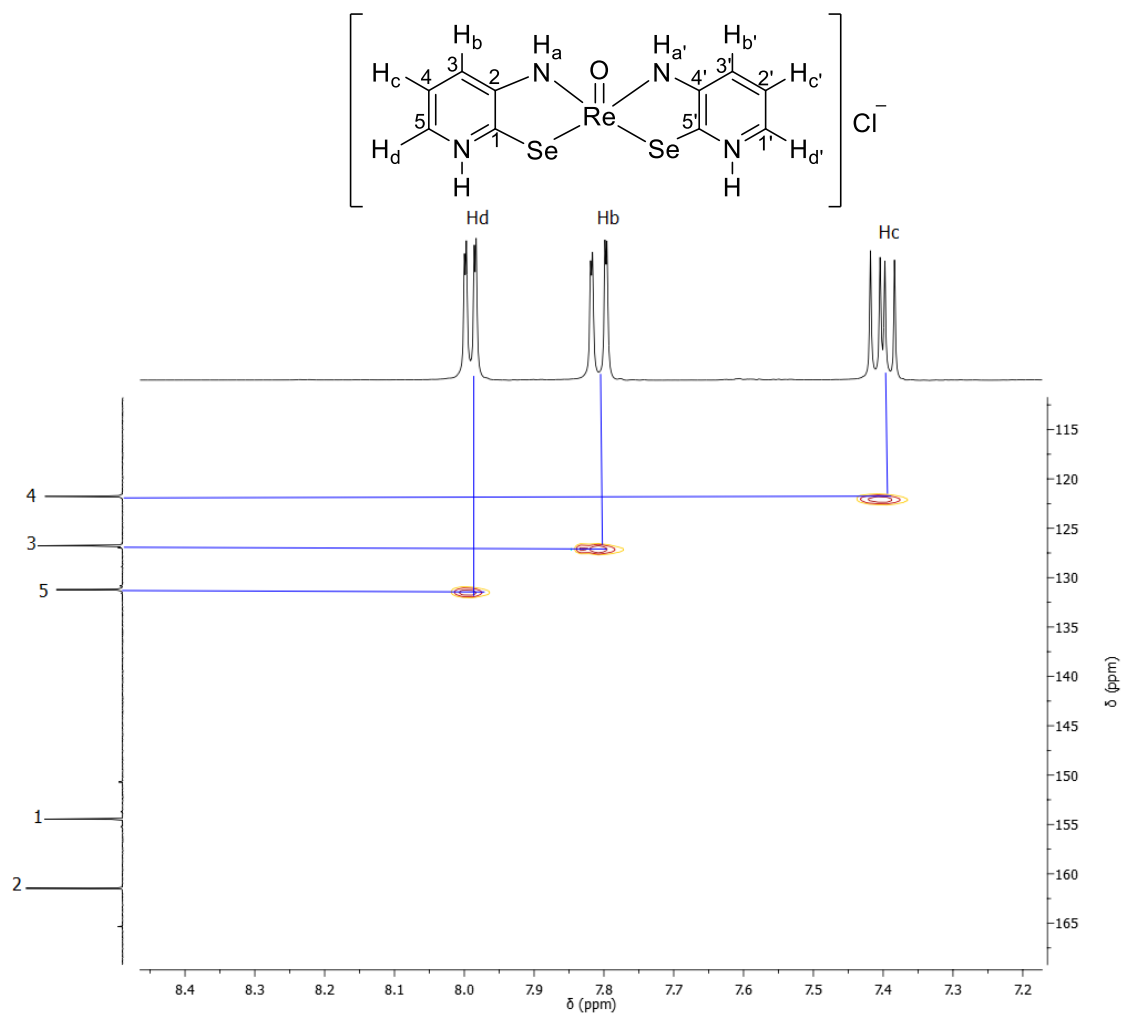

**Figure S20.** 2D HSQC expansion spectrum of complex **6** (DMSO- $d_6$ ).

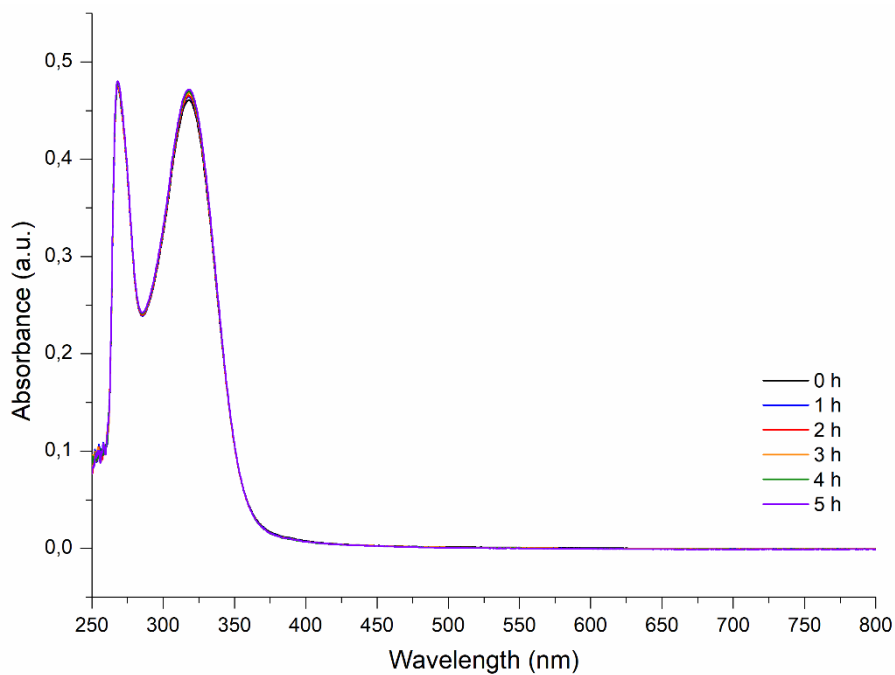

**Figure S21.** Electronic UV-Vis spectra for **L** in H<sub>2</sub>O/DMSO (4:1, v/v) solution, measured every 1 hour (total 5 hours); [ ] =  $1 \times 10^{-4}$  M.

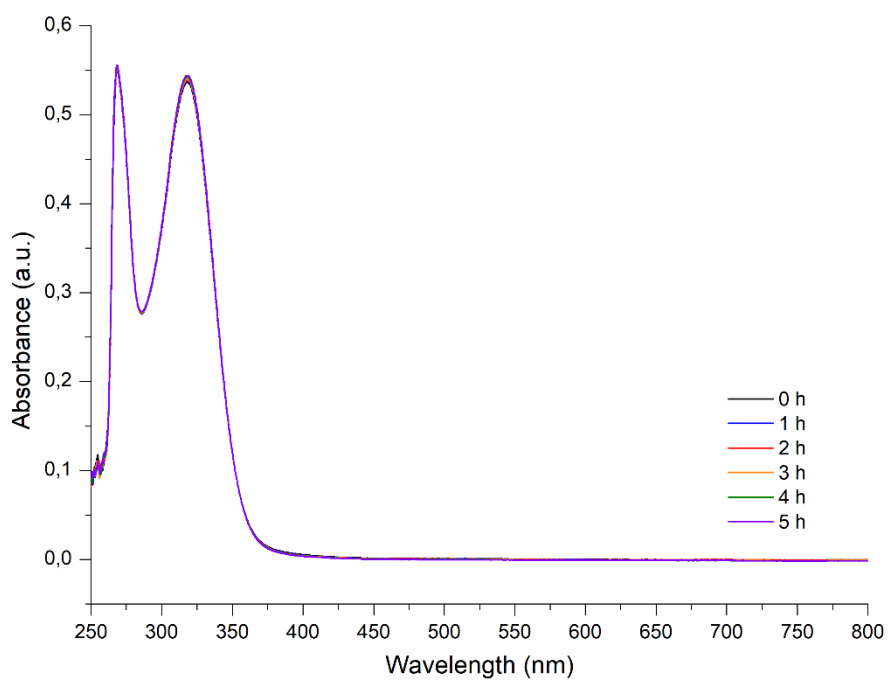

**Figure S22.** Electronic UV-Vis spectra for **1** in H<sub>2</sub>O/DMSO (4:1, v/v) solution, measured every 1 hour (total 5 hours); [ ] =  $1 \times 10^{-4}$  M.

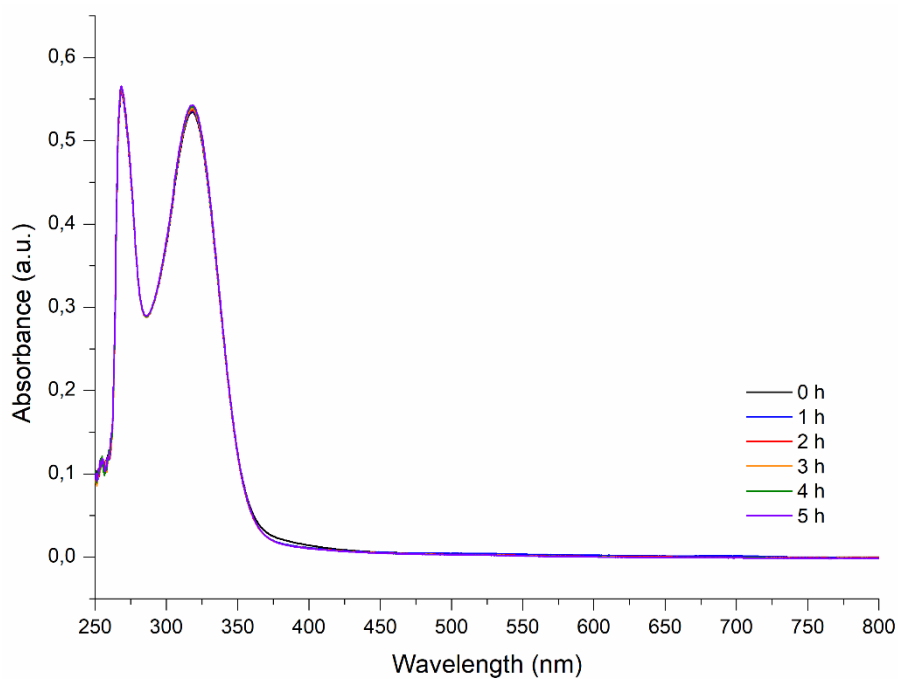

**Figure S23.** Electronic UV-Vis spectra for **2** in H<sub>2</sub>O/DMSO (4:1, v/v) solution, measured every 1 hour (total 5 hours); [ ] =  $1 \times 10^{-4}$  M.

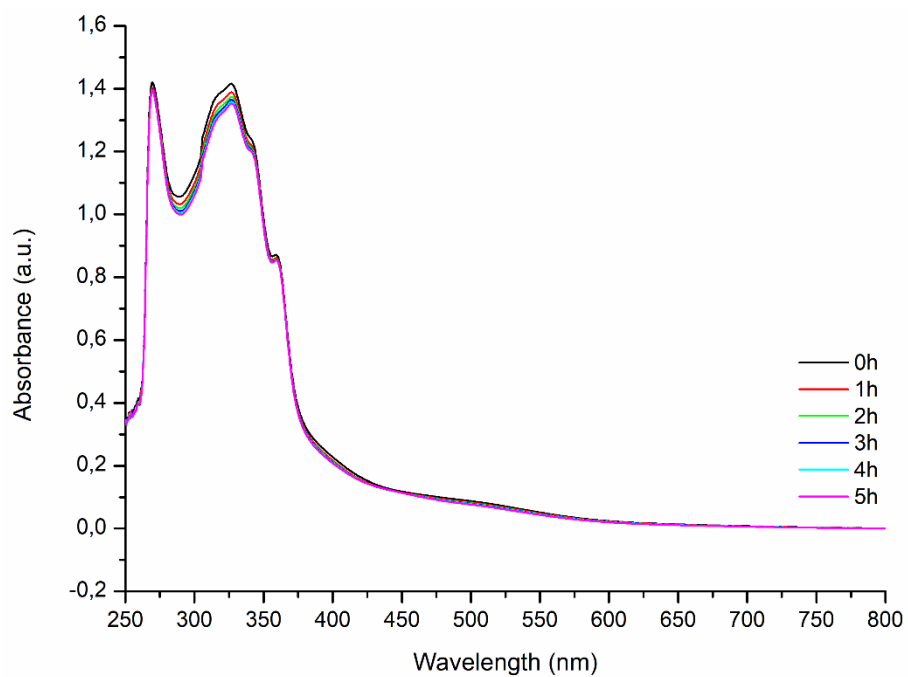

**Figure S24.** Electronic UV-Vis spectra for **3** in H<sub>2</sub>O/DMSO (4:1, v/v) solution, measured every 1 hour (total 5 hours); [ ] =  $1 \times 10^{-4}$  M.

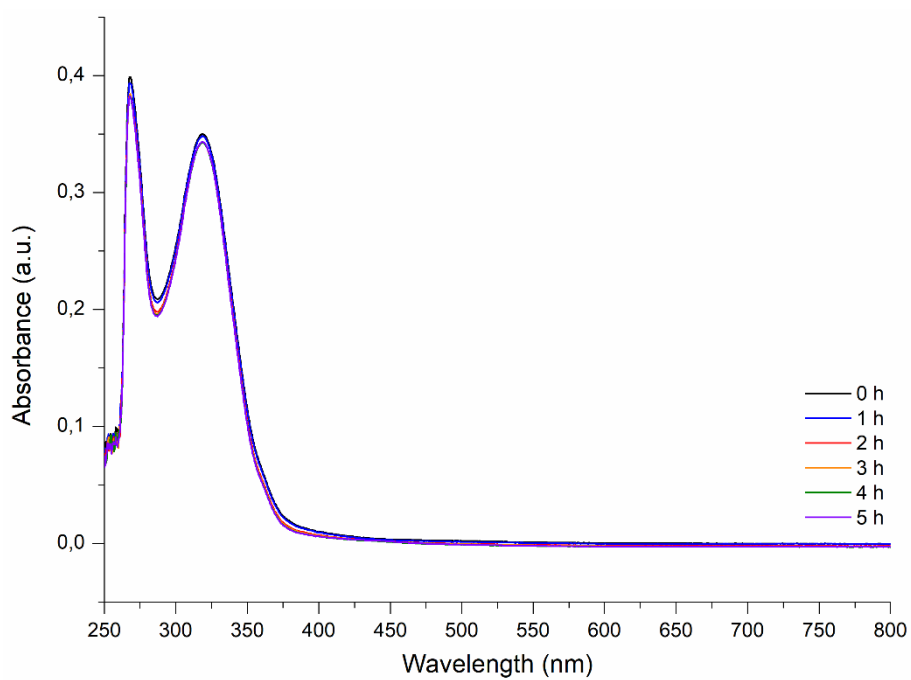

**Figure S25.** Electronic UV-Vis spectra for **4** in H<sub>2</sub>O/DMSO (4:1, v/v) solution, measured every 1 hour (total 5 hours); [ ] =  $1 \times 10^{-4}$  M.

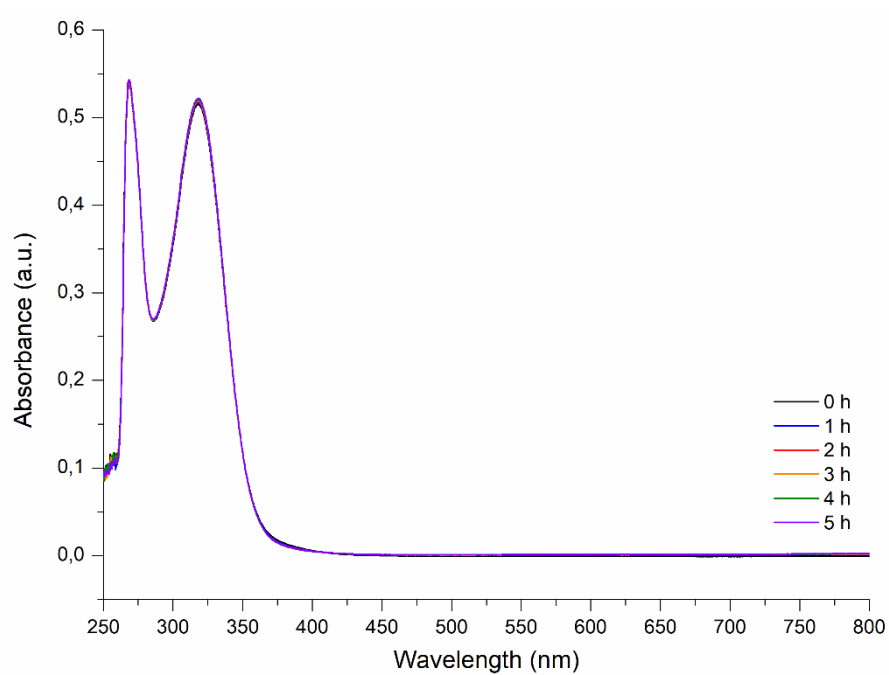

**Figure S26.** Electronic UV-Vis spectra for **5** in H<sub>2</sub>O/DMSO (4:1, v/v) solution, measured every 1 hour (total 5 hours); [ ] =  $1 \times 10^{-4}$  M.

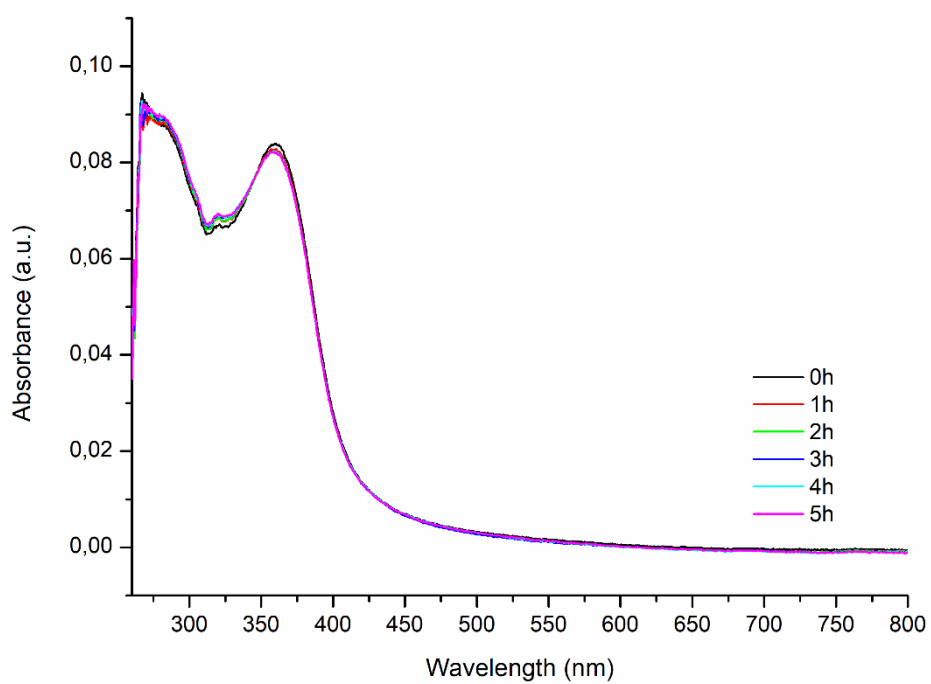

**Figure S27.** Electronic UV-Vis spectra for **6** in H<sub>2</sub>O/DMSO (4:1, v/v) solution, measured every 1 hour (total 5 hours); [ ] =  $1 \times 10^{-4}$  M.
